# Supplementary material for: One Nanozyme, Three Functions: Substrate-Switchable Cu– NH₂–BDC nanozyme for Multiplexed Biosensing in Physiological Environments
Source: Research Square preprint supplement (doi:10.21203/rs.3.rs-8208071/v1), 2025-12-08
Supplement: Supplementary file 1 [file 060b6b42d686c50a465d28ec.docx]

**Supplementary Information**

One Nanozyme, Three Functions: Substrate-Switchable Cu-NH₂-BDC nanozyme for Multiplexed Biosensing in Physiological Environments

Zhiyuan Luoa, Yuwan lub, Ya Wanga, Runrun Yanga, Huazhong Yea, Guobin Xionga, Lingyun Chenga, Hailong Shia, Yaling Yuanc, Siqi Lia*

aSchool of Pharmacy and Bioengineering, Chongqing University of Technology, Chongqing 400054, PR China

bSchool of Chemistry and Chemical Engineering, Chongqing University of Science and Technology, Chongqing, 401331, PR China

cDepartment of Clinical Laboratory, Affiliated Central Hospital of Chongqing University of Technology, The Seventh People’s Hospital of Chongqing, Chongqing, 400054, PR China

*Corresponding authors

*E-mail addresses*: lisiqi47@cqut.edu.cn (S. Li)

**Materials and Methods**

**Reagents**

The reagents used in the experiments were analytically pure. Copper(II) chloride dihydrate (CuCl2·2H2O), Iron(III) chloride hexahydrate (FeCl3·6H2O), Cobalt chloride hexahydrate (CoCl2·6H2O), Copper(II) nitrate trihydrate (Cu(NO3)2·3H2O),2-aminoterephthalic acid (NH2-BDC), Huperzine-A (HA), 5,5’-Dithiobios-(2-nitrobenzoic acid) (DTNB), o-phenylenediamine (OPD), 2,2’-azinobis (3-ethylbenzothiazoline-6-sulfonic acid ammonium salt) (ABTS), 3,3’,5,5’-tetramethylbenzidine (TMB), L-histidine (L-H) ,glycine, L-lysine, glutathione (GSH), ascorbic acid(AA), dopamine (DA) and glucose (Glu) were purchased from Aladdin Co., Ltd. (Shanghai, China). Acetylcholinesterase (AChE) from Electrophorus electricus, acetylthiocholine (ATCh) provided by Sigma-Aldrich (Shanghai, China). 4-aminoantipyrine (4-AP), 2,4-dichlorophenol (2,4-DP), Aluminum chloride hexahydrate (AlCl3·6H2O), p-benzoquinone (PBQ), isopropyl alcohol (IPA) and L-cysteine were obtained from Macklin Biochemical Co., Ltd (Shanghai, China). Milli-Q ultra-pure water with a resistivity of above 18.25 MΩ cm was used throughout the experiments.

**Instruments**

Fluorescence spectra were collected via an F-2710 fluorescence spectrophotometer (Hitachi, Japan). Ultraviolet-visible (UV-vis) absorption spectra were examined by a UV-2450 spectrophotometer (Unico, China). The morphology of the samples was examined by scanning electron microscopy (SEM) with a ZEISS Sigma 300 (ZEISS, Germany) scanning electron microanalyzer. The X-ray diffraction (XRD) patterns of the samples were performed using a Rigaku Ultima IV diffractometer (Rigaku, Japan) with Cu Kα radiation. Ultraviolet–visible diffuse reflectance spectroscopy (UV–vis DRS) spectrophotometer were examined by a UV-2700i (Shimadzu, Japan). The X-ray photoelectron spectroscopy (XPS) measurements were recorded on a K-Alpha (Thermo Scientific, USA) instrument. The FT-IR spectra were recorded by a PerkinElmer IRL 1600300 FTIR spectrometer (PerkinElmer, USA). Zeta potential was measured on a NanoBrook 90Plus PALS (Ambivalue, USA). Steady-state kinetic analysis was performed using a BioTek Synergy H1 multimode microplate reader (BioTek, USA).

**Preparation of Cu-NH₂-BDC**

The synthesis of Cu-NH₂-BDC has been slightly modified from the previous method.[1] CuCl2·2H2O (4.0 mmol, 0.682 g) and NH2-BDC (3.0 mmol, 0.544 g) were dissolved in 30 mL of H2O and stirred for 1 h The mixture was then transferred to a hydrothermal reactor for a reaction at 150 °C for 5 h. After cooling to room temperature, the Cu-NH₂-BDC was finally obtained by centrifugation, washing, and drying. Maintaining identical synthetic conditions, we systematically engineered M-NH2-BDC(M = Fe, Co, Al) through stoichiometric substitution of the CuCl2·2H2O with equivalent molar quantities of FeCl3·6H2O (4.0 mmol), CoCl2·6H2O (4.0 mmol), and AlCl3·6H2O (4.0 mmol), respectively.

**Multi-enzyme activities of Cu-NH₂-BDC nanozyme**

XOD-like activity: The OXD-like activity of Cu-NH₂-BDCs was investigated using o-phenylenediamine (OPD) as a chromogenic substrate. The details were as follows: 100 μL of MOF aqueous dispersion (200 mg/L) and 100 μL OPD (20 mM) were added to Tris-HCl buffer (0.01 M, pH 7.4) with a total volume of 1 mL. The UV–visible absorption spectrum (420 nm) was obtained following incubation at 37 °C in a metal bath for 30 min. In addition, the above experimental steps were repeated with a wide pH (4 - 9) selection. The effects of pH on the OXD-like activity of Cu-NH₂-BDC were further investigated.

POD-like activity: To explore the POD-like behavior of synthetic Cu-NH₂-BDCs, 2,2’-azinobis (3-ethylbenzothiazoline-6-sulfonic acid ammonium salt) (ABTS) was used as a chromogenic substrate to measure the catalytic activity in the presence of H2O2. In detail,100 μL of 200 mg/L MOF suspension was added to 860 μL Tris-HCl buffer (0.01 M, pH 7.4), followed by adding 20 μL of 10 mM H2O2 solution and 20 μL of 10 mM ABTS solution to the above mixture, then the mixed solution was reacted at 37 ℃ for 30 min. The solution change was also monitored by UV-vis. Subsequently, the POD-like catalytic activities at different pH (4 - 9) were compared.

LAC-like activity: The LAC-like activity was studied by 2,4-dichlorophenol (2,4-DP) colorimetry and 4-aminoantipyrine (4-AP). 2,4-DP (100 μL, 1 mg/mL) and 4-AP (100 μL, 1 mg/mL) were added to 700 μL Tris-HCl buffer (0.01 M, pH 7.4). Then, MOF suspension (100 μL, 1 mg/mL) was added to the solution, and the reaction was carried out at 37 °C for 30 min. After centrifugation of the reaction products at 8000 rpm for 3 min, the absorbance of the supernatant was measured at 510 nm by the UV-Vis method. Finally, the LAC-like catalytic activities at different pH (4 - 9) were also compared.

**Steady-state kinetics of Cu-NH₂-BDC nanozyme**

The catalytic performance of the nanozymes was evaluated at pH 6, 7.4, and 8 by fitting the kinetic parameters obtained according to the Michaelis-Menten equation with OPD as the substrate. The initial catalytic rate was monitored by the reaction of different concentrations of OPD with 20 mg/L Cu-NH₂-BDC, respectively. The kinetic curves of OXD-like activities of Cu-NH₂-BDC were measured in a time course mode at an absorbance of 420 nm using a microplate reader.

The kinetic curves detection method of POD-like activities resembles that of OXD-like activities, requiring the addition of a suitable concentration of H2O2 and using ABTS as substrates during the procedure. Similarly, the same procedure was followed for the kinetic curves of LAC-like activities, with the exception that the substrate was replaced with 2,4-DP.

The kinetic parameters (*K*m and *V*max) were calculated using the Michaelis-Menten equation in its Lineweaver-Burk double-reciprocal form: 1/*V*0 = (*K*m /*V*max) (1/[*S*]+1/*V*max), where *V*0 is the apparent initial catalytic rate, *K*m is the Michaelis-Menten constant, *V*max is the maximum apparent initial reaction rate, and [*S*] is the substrate concentration.

**Evaluation of the fluorescence performance.**

Firstly, the fluorescence performance of the synthesized MOFs was evaluated. 100 μL of 0.2 mg/mL MOFs aqueous dispersion was placed in 900 μL Tris-HCl buffer (0.01 M, pH 7.4). The fluorescence intensity at the emission wavelength near 425 nm was measured at 390 nm excitation wavelength (slit width of 5 × 5).

The quantum yields of MOFs were calculated by using quinine sulfate (0.05 M H2SO4) solution as reference together with the following formula:

ФS=ФR×IS/IR×FR/FS

where the subscripts R and S respectively refer to the reference and the sample, Ф is the fluorescence quantum yield, F is the integrated fluorescence intensity under fluorescence emission spectrum, A is the absorbance at the excitation wavelength [2].

**Fluorescence detection of Huperzine A (HA)**

For the detection of HA, different concentrations of HA were first pre-incubated with AChE (3 mU/mL), Tris-HCl buffer (0.01 M, pH 7.4) containing ATCh (0.5 mM) was then added to make a total reaction volume of 100 μL and incubated at 37 ℃ for 30 min, with other detection conditions consistent with the detection of AChE. The inhibition efficiency (IE%) was calculated as follows:

IE% = (*A*i-*A*)/(*A*0-*A*)

where *A* is the ratio of *F*550/*F*425 for the detection of AChE, *A*0 is the ratio of *F*550/*F*425 in the absence of HA and AChE in the reaction system, and *A*i is the ratio of *F*550/*F*425 for the detection of HA.

**Preparation of real samples**

Whole blood samples containing the coagulant were allowed to stand for 3 h, the upper light yellow serum was collected were treated in 3-kDa Amicon ultrafiltration cells at 5000 rpm for 30 min. For the recovery test, different concentrations of DA were added to the centrifuged serum samples as spiked samples. The final spiked concentrations of DA were 5.00, 10.00, and 15.00 μg/mL, respectively. The spiked samples were also determined according to the experimental method in the chapter “Colorimetric detection of dopamine”. The level of DA was then calculated from the calibration curve, and recoveries were obtained.

Practical feasibility of the Cu-NH₂-BDC colorimetric sensor was assessed by determining the total antioxidant capacity (TAC) values of actual samples, including two beverages (Vitamin C Water and Water Soluble C100), two fruits (lemon and kiwi fruit), and two Vitamin C tablets. Firstly, samples of Kiwi fruit and Lemon needed to be peeled and the edible parts ground into a homogenate. Then the tissue homogenates of samples were centrifuged at 16000 rpm for 10 min to collect the supernatant. The beverages and dissolved vitamin C table solution were filtered through a 0.22 μm membrane. Then, the concentration of the samples was further adjusted to keep in line with the linear range of AA detection. The detection procedure was parallel to that of AA.

**Ellman method**

The Ellman method was employed as the reference protocol for determining AChE activity in samples.[3] Specifically, samples were mixed with 0.6 mM ATCh and 0.3 mM DTNB (5,5’-dithiobis-2-nitrobenzoic acid) in 1 mL of Tris-HCl buffer (0.01 M, pH 7.4). The reaction was incubated at 37 °C for 20 min, after which the absorbance of the solution at 412 nm (*A*412) was measured. AChE activity was calculated using a pre-established linear regression equation correlating enzyme activity with *A*412 values. All experimental data were obtained in triplicate.

**2. Supplementary Figures and Tables**

**Scheme S1** The chromogenic reaction equation of different substrates.

**Fig. S1** Tauc plots of Cu-NH₂-BDC (a), Fe-NH₂-BDC (b), Co-NH₂-BDC (c), and Al-NH₂-BDC (d).

**Fig. S2** Valence band (VB) spectra from XPS of Cu-NH₂-BDC (a), Fe-NH₂-BDC (b), Co-NH₂-BDC (c), and Al-NH₂-BDC (d).

**Fig. S3** Steady-state kinetic analysis of the OXD-like activity of Cu-NH₂-BDC. The Michaelis-Menten curves at pH 6 (a), pH 7.4 (b), and pH 8 (c), and the corresponding Lineweaver-Burk double reciprocal plots at pH 6 (d), pH 7.4 (e), and pH 8 (f) of Cu-NH₂-BDC for OPD.

**Fig. S4** Steady-state kinetic analysis of the POD-like activity of Cu-NH₂-BDC. The Michaelis-Menten curves at pH 6 (a), pH 7.4 (b), and pH 8 (c), and the corresponding Lineweaver-Burk double reciprocal plots at pH 6 (d), pH 7.4 (e), and pH 8 (f) of Cu-NH₂-BDC for ABTS.

**Fig. S5** Steady-state kinetic analysis of the POD-like activity of Cu-NH₂-BDC. The Michaelis-Menten curves at pH 6 (a), pH 7.4 (b), and pH 8 (c), and the corresponding Lineweaver-Burk double reciprocal plots at pH 6 (d), pH 7.4 (e), and pH 8 (f) of Cu-NH₂-BDC for H2O2.

**Fig. S6** Steady-state kinetic analysis of the LAC-like activity of Cu-NH₂-BDC. The Michaelis-Menten curves at pH 6 (a), pH 7.4 (b), and pH 8 (c), and the corresponding Lineweaver-Burk double reciprocal plots at pH 6 (d), pH 7.4 (e), and pH 8 (f) of Cu-NH₂-BDC for 2,4-DP

**Fig. S7** Michaelis-Menten parameters of OXD-like, POD-like, and LAC-like activities of Cu-NH₂-BDC at different pH levels

**Fig. S8** Highest occupied molecular orbital (HOMO) - lowest unoccupied molecular orbital (LUMO) energy gaps (ΔE) for ABTS, TMB, and OPD

**Fig. S9** Fluorescence emission spectrum of Cu-NH₂-BDC and UV absorption spectra of oxOPD

**Fig. S10** Zeta potential of Cu-NH₂-BDC at different pH levels

**Fig. S11** Changes of fluorescence intensity of Cu-NH₂-BDC/OPD system under different pH: spectrum graph (a) and scale graph (b)

**Fig. S12**Variation of fluorescence intensity of Cu-NH₂-BDC/OPD system with (a) OPD concentration, (b) catalyst concentration, and (c) reaction time

**Fig. S13** Ellman reagent assay for AChE

**Fig S14** (a) TAC assay of Vitamin drinks, kiwi fruit, and Lemon. (b) TAC assay of two vitamin C tablets. The relevant specifications of vitamin C are presented for verifying the accuracy of the method

**Fig. S15** Laccase activity of Cu-NH2-BDC at different concentrations of DA and AA (100- to 50,000-fold concentrations relative to DA)

**Fig. S16** Stability of OXD-like(a), POD-like(b), and LAC-like activity(c). Morphology after catalysis by OXD-like(d), POD-like(e), and LAC-like activity(f)

**Table S1** Fukui indices of OPD molecules (*f* ⁻, *f* ⁺, and *f* 0)

| **Atom** | **Charge (-)** | **Charge (+)** | **Charge (0)** | ***f*- -** | ***f* +** | ***f* 0** |
| --- | --- | --- | --- | --- | --- | --- |
| C (1) | 0.029 | 0.118 | 0.074 | 0.053 | 0.127 | 0.09 |
| C (2) | 0.044 | 0.025 | 0.035 | 0.087 | 0.076 | 0.082 |
| C (3) | 0.044 | 0.025 | 0.035 | 0.087 | 0.076 | 0.082 |
| C (4) | 0.029 | 0.118 | 0.074 | 0.053 | 0.127 | 0.09 |
| C (6) | 0.041 | 0.039 | 0.04 | 0.067 | 0.068 | 0.067 |
| N (7) | 0.1 | 0.031 | 0.065 | ***0.111*** | 0.048 | 0.079 |
| N (8) | 0.1 | 0.031 | 0.065 | 0.111 | 0.048 | 0.079 |
| H (9) | 0.08 | 0.102 | 0.091 | 0.039 | 0.065 | 0.052 |
| H (10) | 0.091 | 0.095 | 0.093 | 0.049 | 0.05 | 0.05 |
| H (11) | 0.091 | 0.095 | 0.093 | 0.049 | 0.05 | 0.05 |
| H (12) | 0.08 | 0.102 | 0.091 | 0.039 | 0.065 | 0.052 |
| H (13) | 0.062 | 0.045 | 0.054 | 0.05 | 0.034 | 0.042 |
| H (14) | 0.053 | 0.045 | 0.049 | 0.044 | 0.032 | 0.038 |
| H (16) | 0.062 | 0.045 | 0.054 | 0.05 | 0.034 | 0.042 |

**Table S2** Fukui indices of TMB molecules (*f* ⁻, *f* ⁺, and *f* 0)

| **Atom** | **Charge (-) (e/A3)** | **Charge (+) (e/A3)** | **Charge (0) (e/A3)** | ***f -*** | ***f +*** | ***f 0*** | **Atom** | **Charge (-) (e/A3)** | **Charge (+) (e/A3)** | **Charge (0) (e/A3)** | ***f -*** | ***f +*** | ***f 0*** |
| --- | --- | --- | --- | --- | --- | --- | --- | --- | --- | --- | --- | --- | --- |
| C (1) | 0.033 | 0.069 | 0.051 | 0.045 | 0.06 | 0.052 | H (20) | 0.039 | 0.042 | 0.041 | 0.019 | 0.023 | 0.021 |
| C (2) | 0.022 | 0.006 | 0.014 | 0.033 | 0.029 | 0.031 | H (21) | 0.039 | 0.042 | 0.041 | 0.019 | 0.023 | 0.021 |
| C (3) | 0.02 | 0.029 | 0.024 | 0.03 | 0.039 | 0.034 | H (22) | 0.039 | 0.042 | 0.041 | 0.019 | 0.023 | 0.021 |
| C (4) | 0.022 | 0.032 | 0.027 | 0.039 | 0.043 | 0.041 | H (23) | 0.029 | 0.026 | 0.027 | 0.015 | 0.014 | 0.015 |
| C (5) | 0.019 | 0.029 | 0.024 | 0.03 | 0.038 | 0.034 | H (24) | 0.03 | 0.033 | 0.032 | 0.017 | 0.018 | 0.018 |
| C (6) | 0.022 | 0.007 | 0.014 | 0.033 | 0.029 | 0.031 | H (25) | 0.032 | 0.033 | 0.032 | 0.018 | 0.018 | 0.018 |
| C (7) | 0.022 | 0.032 | 0.027 | 0.039 | 0.043 | 0.041 | H (26) | 0.036 | 0.032 | 0.034 | 0.029 | 0.024 | 0.027 |
| C (8) | 0.02 | 0.029 | 0.024 | 0.03 | 0.039 | 0.034 | H (27) | 0.036 | 0.031 | 0.033 | 0.029 | 0.024 | 0.026 |
| C (9) | 0.019 | 0.029 | 0.024 | 0.03 | 0.038 | 0.034 | H (28) | 0.031 | 0.033 | 0.032 | 0.018 | 0.018 | 0.018 |
| C (10) | 0.022 | 0.007 | 0.014 | 0.033 | 0.029 | 0.031 | H (29) | 0.028 | 0.026 | 0.027 | 0.015 | 0.014 | 0.015 |
| C (11) | 0.033 | 0.069 | 0.051 | 0.045 | 0.06 | 0.052 | H (30) | 0.031 | 0.034 | 0.032 | 0.018 | 0.019 | 0.018 |
| C (12) | 0.022 | 0.006 | 0.014 | 0.033 | 0.029 | 0.031 | H (31) | 0.028 | 0.026 | 0.027 | 0.015 | 0.014 | 0.015 |
| C (13) | -0.016 | -0.016 | -0.016 | 0.012 | 0.012 | 0.012 | H (32) | 0.031 | 0.034 | 0.032 | 0.018 | 0.019 | 0.018 |
| N (14) | 0.062 | 0.028 | 0.045 | ***0.071*** | 0.044 | 0.057 | H (33) | 0.031 | 0.033 | 0.032 | 0.018 | 0.018 | 0.018 |
| C (15) | -0.016 | -0.016 | -0.016 | 0.012 | 0.012 | 0.012 | H (34) | 0.036 | 0.032 | 0.034 | 0.029 | 0.024 | 0.027 |
| C (16) | -0.016 | -0.016 | -0.016 | 0.012 | 0.012 | 0.012 | H (35) | 0.036 | 0.031 | 0.033 | 0.029 | 0.024 | 0.026 |
| N (17) | 0.062 | 0.028 | 0.045 | 0.071 | 0.044 | 0.057 | H (36) | 0.032 | 0.033 | 0.032 | 0.018 | 0.018 | 0.018 |
| C (18) | -0.016 | -0.016 | -0.016 | 0.012 | 0.012 | 0.012 | H (37) | 0.029 | 0.026 | 0.027 | 0.015 | 0.014 | 0.015 |
| H (19) | 0.039 | 0.042 | 0.041 | 0.019 | 0.023 | 0.021 | H (38) | 0.03 | 0.033 | 0.032 | 0.017 | 0.018 | 0.018 |

**Table S3** Fukui indices of ABTS molecules (*f* ⁻, *f* ⁺, and *f* 0)

| **Atom** | **Charge**  **(-)**  **(e/A3)** | **Charge**  **(+)**  **(e/A3)** | **Charge**  **(0) (e/A3)** | ***f -*** | ***f +*** | ***f 0*** | **Atom** | **Charge**  **(-) (e/A3)** | **Charge (+) (e/A3)** | **Charge (0) (e/A3)** | ***f -*** | ***f +*** | ***f 0*** |
| --- | --- | --- | --- | --- | --- | --- | --- | --- | --- | --- | --- | --- | --- |
| O ( 1) | 0.027 | 0.037 | 0.032 | 0.024 | 0.033 | 0.029 | C (26) | 0.02 | 0.028 | 0.024 | 0.027 | 0.029 | 0.028 |
| O ( 2) | 0.022 | 0.032 | 0.027 | 0.019 | 0.029 | 0.024 | C (27) | 0.021 | 0.037 | 0.029 | 0.023 | 0.039 | 0.031 |
| O ( 3) | 0.016 | 0.022 | 0.019 | 0.016 | 0.025 | 0.021 | S (28) | 0.112 | 0.066 | 0.089 | 0.097 | 0.053 | 0.075 |
| S (4) | 0.007 | 0.021 | 0.014 | 0.011 | 0.027 | 0.019 | C (29) | 0.017 | 0.02 | 0.019 | 0.023 | 0.031 | 0.027 |
| C (5) | 0.013 | 0.022 | 0.018 | 0.026 | 0.033 | 0.03 | N (30) | 0.028 | 0 | 0.014 | 0.028 | 0.009 | 0.019 |
| C (6) | 0.016 | 0.016 | 0.016 | 0.025 | 0.027 | 0.026 | C (31) | 0.002 | -0.002 | 0 | 0.015 | 0.013 | 0.014 |
| C (7) | 0.019 | 0.033 | 0.026 | 0.021 | 0.035 | 0.028 | C (32) | 0.004 | 0.034 | 0.019 | 0.009 | 0.031 | 0.02 |
| C (8) | -0.005 | -0.004 | -0.004 | 0.007 | 0.004 | 0.006 | H (33) | 0.01 | 0.015 | 0.013 | 0.008 | 0.013 | 0.011 |
| C (9) | 0.019 | 0.018 | 0.019 | 0.024 | 0.03 | 0.027 | H (34) | 0.031 | 0.034 | 0.032 | 0.016 | 0.017 | 0.017 |
| C (10) | 0.004 | -0.001 | 0.002 | 0.015 | 0.013 | 0.014 | H (35) | 0.026 | 0.031 | 0.028 | 0.013 | 0.018 | 0.016 |
| C (11) | -0.018 | -0.013 | -0.015 | 0.006 | 0.004 | 0.005 | H (36) | 0.028 | 0.023 | 0.025 | 0.014 | 0.011 | 0.013 |
| C (12) | 0.002 | 0.035 | 0.018 | 0.008 | 0.032 | 0.02 | H (37) | 0.015 | 0.007 | 0.011 | 0.008 | 0.005 | 0.006 |
| S (13) | 0.095 | 0.058 | 0.077 | ***0.079*** | 0.046 | 0.062 | H (38) | 0.001 | 0.003 | 0.002 | 0.003 | 0.002 | 0.003 |
| N (14) | 0.026 | 0 | 0.013 | 0.03 | 0.01 | 0.02 | H (39) | 0.028 | 0.034 | 0.031 | 0.015 | 0.018 | 0.016 |
| C (15) | 0.019 | 0.025 | 0.022 | 0.026 | 0.026 | 0.026 | H (40) | 0.011 | 0.01 | 0.01 | 0.006 | 0.005 | 0.006 |
| O (16) | 0.027 | 0.037 | 0.032 | 0.024 | 0.034 | 0.029 | H (41) | 0.027 | 0.017 | 0.022 | 0.013 | 0.008 | 0.01 |
| O (17) | 0.023 | 0.033 | 0.028 | 0.02 | 0.029 | 0.024 | H (42) | 0.011 | 0.016 | 0.013 | 0.009 | 0.013 | 0.011 |
| O (18) | 0.016 | 0.022 | 0.019 | 0.017 | 0.026 | 0.021 | H (43) | 0.028 | 0.022 | 0.025 | 0.014 | 0.011 | 0.012 |
| N (19) | 0.049 | 0.018 | 0.033 | 0.053 | 0.019 | 0.036 | H (44) | 0 | 0.002 | 0.001 | 0.002 | 0.002 | 0.002 |
| S (20) | 0.007 | 0.021 | 0.014 | 0.01 | 0.027 | 0.019 | H (45) | 0.017 | 0.008 | 0.013 | 0.009 | 0.005 | 0.007 |
| C (21) | -0.006 | -0.004 | -0.005 | 0.007 | 0.004 | 0.006 | H (46) | 0.032 | 0.034 | 0.033 | 0.017 | 0.017 | 0.017 |
| N (22) | 0.049 | 0.019 | 0.034 | 0.055 | 0.022 | 0.039 | H (47) | 0.028 | 0.017 | 0.022 | 0.013 | 0.008 | 0.01 |
| C (23) | 0.012 | 0.023 | 0.018 | 0.026 | 0.035 | 0.03 | H (48) | 0.007 | 0.008 | 0.007 | 0.005 | 0.004 | 0.004 |
| C (24) | 0.018 | 0.015 | 0.017 | 0.027 | 0.026 | 0.027 | H (49) | 0.028 | 0.033 | 0.031 | 0.014 | 0.019 | 0.017 |
| C (25) | -0.017 | -0.013 | -0.015 | 0.006 | 0.003 | 0.029 | H (50) | 0.027 | 0.033 | 0.03 | 0.014 | 0.018 | 0.016 |

**Table S4** Comparison of different AChE assays

| **Probes** | **Nanozyme incubation pH** | | **linear range**  **(mU/mL)** | **LOD**  **(mU/mL)** | **Ref** |
| --- | --- | --- | --- | --- | --- |
| Fe(HCOO)2.6(OH)0.3. H2O  FeMn DSAs/N-CNTs | | 3  4 | 0.1-30  1-30 | 0.0083  0.066 | [4]  [5] |
| Cu-CAT NSs | 4 | | 0.01-4.0 | 0.01 | [6] |
| Fe–N–C Nanozyme | 4.2 | | 3-40 | 1.9 | [7] |
| MnO2 nanosheets | 4.5 | | 0.1-15 | 0.035 | [8] |
| CoCOOH | 4 | | 0.05-5 | 0.033 | [9] |
| Rh-N/C | 7 | | 0.001–1.0 | 0.00032 | [10] |
| Co3O4/MoO3 | 4 | | 0.005-1.0 | 0.1 | [11] |
| Fe-N-C Sazymes | 4 | | 0.1-25 | 0.014 | [12] |
| MnOOH nanowire | 4 | | 0.01-1.25 | 0.007 | [13] |
| Cu-NH₂-BDC | 7.4 | | 0.001-5 | 0.001 | This work |

**Table S5** Measurementof serum AChE levels (n = 3)

| **Samples** | **Cu-NH₂-BDC Probe (mU/mL)** | **RSD (%)**  **n = 3** | **Ellman method (mU/mL)** | **RSD (%)**  **n = 3** |
| --- | --- | --- | --- | --- |
| 1 | 9107.56 ± 11.29 | 0.04 | 8161.72 ± 5.77 | 0.71 |
| 2 | 8088.86 ± 714.27 | 2.66 | 8045.37 ± 28.29 | 3.49 |
| 3 | 9870.35 ± 682.04 | 2.58 | 9848.74 ± 11.54 | 1.26 |
| 4 | 9381.23 ± 266.11 | 0.99 | 9267.01 ± 28.28 | 3.21 |
| 5 | 8878.70 ± 336.23 | 1.24 | 8103.54 ± 5.37 | 0.70 |

**Table S6** Measurement of serum DA levels (n = 3)

| **Samples** | **Added (μg/mL)** | **Found (μg/mL)** | **Recovery (%)** | **RSD (%)** |
| --- | --- | --- | --- | --- |
| 1 | 0.00 | 0.87 | -- | -- |
| 5.00 | 4.71 | 94.22 | 1.63 |
| 10.00 | 10.28 | 102.84 | 2.46 |
| 15.00 | 13.98 | 93.20 | 1.57 |
| 2 | 0.00 | 0.85 | -- | -- |
| 5.00 | 4.77 | 95.41 | 2.43 |
| 10.00 | 9.71 | 97.11 | 2.37 |
| 15.00 | 15.26 | 101.76 | 2.68 |

**Table S 7** Comparison of different NH2-Cu-BDC nanozyme

| **Nanozyme** | **pH** | **Analyte** | **Enzyme-like activity** | **LOD** | **Ref** |
| --- | --- | --- | --- | --- | --- |
| Cu-NH2-BDC-Mel | 7 | EPI,  DA | Lac | 3.51μM,  4.41 μM | [14] |
| Cu-BDC-X,  (X = OH, NH2, NO2, COOH) | 7 | Glyphosate, pesticide | LAC | 37 ng/mL | [15] |
| Cu-BDC-NH2 | 13,  7 | Glucose, H2O2 | - | 1.2µM,  1.5µM | [16] |
| Cu-BDC-NH2 | 7 | pesticide | LAC, POD | 1 μg/mL | [17] |
| Cu-BDC-NH2 | 8 | Catechol | OXD | 0.997 μM | [18] |
| Cu-BDC-NH2NPs | 4 | AA | POD | 0.15μM | [19] |
| Cu–NH₂–BDC | 7.4 | AChE,  AA,  DA | OXD,  POD,  LAC | 0.001 mU/mL  0.6 μM  0.048 μg/mL | This work |

**Reference**

[1] Z. Li, D. Zhan, A. Saeed, N. Zhao, J. Wang, W. Xu, J. Liu, Fluoride sensing performance of fluorescent NH2-MIL-53(Al): 2D nanosheets vs. 3D bulk, Dalton Trans. 50 (2021) 8540-8548. <https://doi.org/10.1039/d1dt00666e>.

[2] C.P. Han, R. Wang, K.Y. Wang, H.T. Xu, M.R. Sui, J.J. Li, K. Xu, Highly fluorescent carbon dots as selective and sensitive "on-off-on" probes for iron(III) ion and apoferritin detection and imaging in living cells, Biosensors & Bioelectronics 83 (2016) 229-236. <https://doi.org/10.1016/j.bios.2016.04.066>.

[3] M. Pohanka, M. Hrabinova, K. Kuca, J. Simonato, Assessment of acetylcholinesterase activity using Indoxylacetate and comparison with the standard ellman’s method, International Journal of Molecular Sciences 12 (2011) 2631-2640. <https://doi.org/10.3390/ijms12042631>.

[4] Y. Cao, Y. Chen, Y. Zhou, X. Chen, J. Peng, Direct detection of acetylcholinesterase by Fe(HCOO)2.6(OH)0.3. H2O nanosheets with oxidase-like activity on a smartphone platform, Talanta 274 (2024) 126074. <https://doi.org/10.1016/j.talanta.2024.126074>.

[5] Y. Mao, J. Zhang, R. Zhang, J. Li, A. Wang, X. Zhou, J. Feng, N-Doped Carbon Nanotubes Supported Fe–Mn Dual-Single-Atoms Nanozyme with Synergistically Enhanced Peroxidase Activity for Sensitive Colorimetric Detection of Acetylcholinesterase and Its Inhibitor, Analytical Chemistry 95 (2023) 8640-8648. <https://doi.org/10.1021/acs.analchem.3c01070>.

[6] F. Wang, M. Liu, X. Niu, L. Xia, F. Qu, Dextran-assisted ultrasonic exfoliation of two-dimensional metal-organic frameworks to evaluate acetylcholinesterase activity and inhibitor screening, Analytica Chimica Acta 1243 (2023) 340815. <https://doi.org/doi.org/10.1016/j.aca.2023.340815>.

[7] L. Lu, X. Hu, R. Zeng, Q. Lin, X. Huang, M. Li, D. Tang, Dual-mode colorimetric-photothermal sensing platform of acetylcholinesterase activity based on the peroxidase-like activity of Fe–N–C nanozyme, Analytica Chimica Acta 1229 (2022) 340383. <https://doi.org/doi.org/10.1016/j.aca.2022.340383>.

[8] E. Sheng, Y. Lu, Y. Tan, Y. Xiao, Z. Li, Z. Dai, Oxidase-mimicking activity of ultrathin MnO2 nanosheets in a colorimetric assay of chlorothalonil in food samples, Food Chemistry 331 (2020) 127090. <https://doi.org/10.1016/j.foodchem.2020.127090>.

[9] R. Jin, Z. Xing, D. Kong, X. Yan, F. Liu, Y. Gao, P. Sun, X. Liang, G. Lu, Sensitive colorimetric sensor for point-of-care detection of acetylcholinesterase using cobalt oxyhydroxide nanoflakes, Journal of Materials Chemistry B 7 (2019) 1230-1237. <https://doi.org/10.1039/C8TB02987C>.

[10] J. Guan, M. Wang, R. Ma, Q. Liu, X. Sun, Y. Xiong, X. Chen, Single-atom Rh nanozyme: an efficient catalyst for highly sensitive colorimetric detection of acetylcholinesterase activity and adrenaline, Sensors and Actuators B: Chemical 375 (2023) 132972. <https://doi.org/10.1016/j.snb.2022.132972>.

[11] X. Zhang, Y. Lu, Q. Chen, Y. Huang, A tunable bifunctional hollow Co3O4/MO3 (M = Mo, W) mixed-metal oxide nanozyme for sensing H2O2 and screening acetylcholinesterase activity and its inhibitor, Journal of Materials Chemistry B 8 (2020) 6459-6468. <https://doi.org/10.1039/D0TB01337D>.

[12] Y. Wu, L. Jiao, X. Luo, W. Xu, X. Wei, H. Wang, H. Yan, W. Gu, B.Z. Xu, D. Du, Y. Lin, C. Zhu, Oxidase-like Fe-N-C single-atom nanozymes for the detection of acetylcholinesterase activity, Small 15 (2019) 1903108. <https://doi.org/https://doi.org/10.1002/smll.201903108>.

[13] L. Huang, D.-W. Sun, H. Pu, Q. Wei, L. Luo, J. Wang, A colorimetric paper sensor based on the domino reaction of acetylcholinesterase and degradable γ-MnOOH nanozyme for sensitive detection of organophosphorus pesticides, Sensors and Actuators B: Chemical 290 (2019) 573-580. <https://doi.org/10.1016/j.snb.2019.04.020>.

[14] H. Qiao, H. Yang, Y. Han, Y. Liu, Y. Zhang, X. Zhang, Excellent laccase-like activity of melamine modified Cu-NH2-BDC and selective sensing analyses toward phenols and amines, Nano Research 17 (2024) 9887-9897. <https://doi.org/10.1007/s12274-024-6888-7>.

[15] Z. Liu, Y. Feng, Y. Cui, Y. Wang, Z. Fu, J. Zhao, H. Li, C. Sun, Tuning ligand substituents of metal-organic frameworks enhances laccase-like activity for pesticide detection, Food Chemistry 488 (2025). <https://doi.org/10.1016/j.foodchem.2025.144892>.

[16] Y. Yang, R. Jiang, M. Wang, J. Xiong, Y. Cheng, H. Zhang, L. Chen, 3D gyroscopic copper-based metal-organic framework for high sensitivity detection of glucose and H2O2, Microchemical Journal 200 (2024) 110224. <https://doi.org/10.1016/j.microc.2024.110224>.

[17] D. Song, T. Tian, L. Wang, Y. Zou, L. Zhao, J. Xiao, H. Huang, Y. Li, Multi-signal sensor array based on a fluorescent nanozyme for broad-spectrum screening of pesticides, Chemical Engineering Journal 482 (2024) 148784. <https://doi.org/10.1016/j.cej.2024.148784>.

[18] L. Wang, Y. Sun, H. Zhang, W. Shi, H. Huang, Y. Li, Selective sensing of catechol based on a fluorescent nanozyme with catechol oxidase activity, Spectrochimica Acta Part A: Molecular and Biomolecular Spectroscopy 302 (2023). <https://doi.org/10.1016/j.saa.2023.123003>.

[19] Z. Yao, Z. Li, H. Liu, Y. Liu, Y. Sun, Z. Li, A novel colorimetric assay based on the peroxidase-like properties of amino functionalized copper metal–organic framework nanoparticles for ascorbic acid sensing, Analytical Methods 11 (2019) 1697-1706. <https://doi.org/10.1039/c9ay00172g>.
